# Supplementary material for: Structural movies of the gradual spin-crossover in a molecular complex at various physical scales
Source: Royal Society of Chemistry journal article supplement (doi:10.1039/c6cp04987g), 2016-01-01
Supplement: c6cp04987g1.pdf [file c6cp04987g1.pdf]

# Material Supplementary for

**Structural movies of the gradual spin-crossover in a molecular complex at various physical scales.**

S. Lakhlofij,<sup>a</sup> M. H. Lemée-Cailleau,<sup>b</sup> G. Chastanet,<sup>a</sup> P. Rosa,<sup>a</sup> N. Daro<sup>a</sup> and P. Guionneau\*<sup>a</sup>

**A- Experimental and crystallographic data for the SCXRD study of [Fe(PM-AzA)<sub>2</sub>(NCS)<sub>2</sub>]**

**B- Experimental and crystallographic data for the SCXRD study of [Zn(PM-AzA)<sub>2</sub>(NCS)<sub>2</sub>]**

**C- MOSSBAUER of [Fe(PM-AzA)<sub>2</sub>(NCS)<sub>2</sub>]**

**D- Matrix of the DILATATION TENSORS**

**E- POSITIONNAL DISORDER in [Fe(PM-AzA)<sub>2</sub>(NCS)<sub>2</sub>]**

**F- Structural movies: see attached .ppt file**

### A- Experimental and crystallographic data for the SCXRD study of [Fe(PM-AzA)<sub>2</sub>(NCS)<sub>2</sub>]

| T(K)                                                                      | 290                | 270                | 250                | 230                | 210                | 190                | 170                | 150                |
|---------------------------------------------------------------------------|--------------------|--------------------|--------------------|--------------------|--------------------|--------------------|--------------------|--------------------|
| a (Å)                                                                     | 15,1215(12)        | 15,1117(11)        | 15,1063(11)        | 15,0961(11)        | 15,0821(11)        | 15,0573(10)        | 15,0294(11)        | 15,0119(11)        |
| b (Å)                                                                     | 14,5537(12)        | 14,5148(12)        | 14,4809(11)        | 14,4493(11)        | 14,4302(11)        | 14,4200(10)        | 14,4106(11)        | 14,3903(11)        |
| c (Å)                                                                     | 17,0259(8)         | 17,0110(8)         | 16,9914(8)         | 16,9550(7)         | 16,8916(7)         | 16,7947(7)         | 16,7098(7)         | 16,6678(8)         |
| β (°)                                                                     | 92,957(4)          | 93,032(4)          | 93,085(4)          | 93,099(4)          | 93,026(4)          | 92,889(4)          | 92,796(4)          | 92,793(4)          |
| V (Å <sup>3</sup> )                                                       | 3742,0(5)          | 3726,0(4)          | 3711,5(4)          | 3693,0(4)          | 3671,1(4)          | 3641,9(4)          | 3614,7(4)          | 3596,4(4)          |
| μ (mm <sup>-1</sup> )                                                     | 0,556              | 0,559              | 0,561              | 0,564              | 0,567              | 0,572              | 0,576              | 0,579              |
| ρ (g cm <sup>-3</sup> )                                                   | 1,322              | 1,327              | 1,333              | 1,339              | 1,347              | 1,358              | 1,368              | 1,375              |
| Domaine angulaire θ (°)                                                   | 2,25 – 22,98       | 2,25 – 21,25       | 2,25 – 21,24       | 2,25 – 21,31       | 2,26 - 21,24       | 3,34 - 21,25       | 3,34 - 21,25       | 3,35 - 21,25       |
| Complétude                                                                | 0,75               | 0,85               | 0,85               | 0,84               | 0,85               | 0,85               | 0,85               | 0,85               |
| h min / max                                                               | -15/15             | -15/15             | -15/15             | -15/15             | -15/15             | -15/15             | -15/15             | -15/15             |
| k min / max                                                               | -12/14             | -11/14             | -11/14             | -11/14             | -11/14             | -11/14             | -11/14             | -11/14             |
| l min / max                                                               | -14/13             | -14/13             | -14/13             | -14/13             | -14/13             | -14/13             | -13/13             | -13/13             |
| Réflexions collectées                                                     | 6377               | 5885               | 5852               | 5827               | 5776               | 5754               | 5700               | 5650               |
| Réflexions<br>Indépendantes (R <sub>int</sub> )                           | 3871<br>(0,0273)   | 3509<br>(0,0250)   | 3493<br>(0,0239)   | 3484<br>(0,0231)   | 3449<br>(0,0233)   | 3434<br>(0,0219)   | 3408<br>(0,0215)   | 3378<br>(0,0208)   |
| R(sigma)                                                                  | 0,0475             | 0,0428             | 0,0417             | 0,0407             | 0,0400             | 0,0389             | 0,0380             | 0,0367             |
| Réflexions Observées<br>seuil : I/σ(I)=2                                  | 2882               | 2759               | 2769               | 2809               | 2824               | 2862               | 2929               | 2956               |
| Nombre de paramètres                                                      | 460                | 460                | 460                | 460                | 460                | 460                | 460                | 460                |
| R <sub>obs</sub> (all)                                                    | 0,0401<br>(0,0633) | 0,0371<br>(0,0545) | 0,0353<br>(0,0517) | 0,0350<br>(0,0496) | 0,0340<br>(0,0469) | 0,0326<br>(0,0443) | 0,0298<br>(0,0387) | 0,0273<br>(0,0348) |
| wR <sub>2</sub> <sub>obs</sub> (all)                                      | 0,0806<br>(0,0897) | 0,0784<br>(0,0860) | 0,0773<br>(0,0847) | 0,0778<br>(0,0847) | 0,0778<br>(0,0840) | 0,0748<br>(0,0806) | 0,0700<br>(0,0743) | 0,0651<br>(0,0689) |
| S                                                                         | 1,042              | 1,046              | 1,050              | 1,032              | 1,028              | 1,060              | 1,025              | 1,012              |
| Δρ <sub>min</sub> / Δρ <sub>max</sub> (e <sup>-</sup> · Å <sup>-3</sup> ) | -0,150/0,289       | 0,305/-0,178       | 0,278/-0,167       | 0,262/-0,206       | 0,241/-0,209       | 0,270/-0,207       | 0,294/-0,183       | 0,248/-0,175       |

| <b>T(K)</b>                                                             | <b>130</b>         | <b>110</b>         | <b>140</b>         | <b>160</b>         | <b>180</b>         | <b>200</b>         | <b>220</b>         | <b>240</b>         |
|-------------------------------------------------------------------------|--------------------|--------------------|--------------------|--------------------|--------------------|--------------------|--------------------|--------------------|
| $a$ (Å)                                                                 | 15,0090(11)        | 14,9984(9)         | 15,0070(10)        | 15,0178(10)        | 15,0406(10)        | 15,0713(10)        | 15,0861(11)        | 15,1046(11)        |
| $b$ (Å)                                                                 | 14,3641(11)        | 14,3524(10)        | 14,3798(10)        | 14,4001(10)        | 14,4132(10)        | 14,4223(11)        | 14,4369(11)        | 14,4631(11)        |
| $c$ (Å)                                                                 | 16,6475(7)         | 16,6350(6)         | 16,6543(6)         | 16,6809(7)         | 16,7432(7)         | 16,8453(7)         | 16,9270(7)         | 16,9754(8)         |
| $\beta$ (°)                                                             | 92,803(4)          | 92,822(3)          | 92,812(3)          | 92,794(4)          | 92,832(3)          | 92,962(4)          | 93,073(4)          | 93,103(4)          |
| $V$ (Å <sup>3</sup> )                                                   | 3584,8(4)          | 3576,6(4)          | 3589,6(4)          | 3603,1(4)          | 3625,2(4)          | 3656,6(4)          | 3681,3(4)          | 3703,0(4)          |
| $\mu$ (mm <sup>-1</sup> )                                               | 0,581              | 0,582              | 0,580              | 0,578              | 0,574              | 0,569              | 0,565              | 0,562              |
| $\rho$ (g cm <sup>-3</sup> )                                            | 1,380              | 1,383              | 1,378              | 1,373              | 1,364              | 1,353              | 1,344              | 1,336              |
| Domaine angulaire $\theta$ (°)                                          | 3,35 - 21,28       | 3,35 - 21,27       | 3,35 - 21,30       | 2,28 - 21,28       | 3,34 - 21,26       | 2,26 - 21,23       | 2,26 - 21,27       | 2,25 - 21,23       |
| Complétude                                                              | 0,84               | 0,85               | 0,84               | 0,85               | 0,85               | 0,85               | 0,85               | 0,85               |
| h min / max                                                             | -15/15             | -15/15             | -15/15             | -15/15             | -15/15             | -15/15             | -15/15             | -15/15             |
| k min / max                                                             | -11/14             | -11/14             | -11/14             | -11/14             | -11/14             | -11/14             | -11/14             | -11/14             |
| l min / max                                                             | -13/13             | -13/13             | -13/13             | -13/13             | -14/13             | -14/13             | -14/13             | -14/13             |
| Réflexions collectées                                                   | 5624               | 5635               | 5659               | 5688               | 5728               | 5753               | 5805               | 5833               |
| Réflexions<br>Indépendantes ( $R_{int}$ )                               | 3376<br>(0,0212)   | 3366<br>(0,0262)   | 3382<br>(0,0197)   | 3396<br>(0,0200)   | 3416<br>(0,0220)   | 3432<br>(0,0232)   | 3470<br>(0,0236)   | 3476<br>(0,0240)   |
| R(sigma)                                                                | 0,0363             | 0,0384             | 0,0357             | 0,0365             | 0,0381             | 0,0398             | 0,0405             | 0,0413             |
| Réflexions Observées<br>seuil : $I/\sigma(I)=2$                         | 2986               | 3007               | 2985               | 2941               | 2882               | 2822               | 2810               | 2767               |
| Nombre de paramètres                                                    | 460                | 460                | 460                | 460                | 460                | 460                | 460                | 460                |
| $R_{obs}$ (all)                                                         | 0,0263<br>(0,0328) | 0,0277<br>(0,0332) | 0,0265<br>(0,0328) | 0,0285<br>(0,0366) | 0,0306<br>(0,0412) | 0,0329<br>(0,0453) | 0,0339<br>(0,0476) | 0,0351<br>(0,0503) |
| $wR2_{obs}$ (all)                                                       | 0,0619<br>(0,0650) | 0,0661<br>(0,0689) | 0,0606<br>(0,0634) | 0,0653<br>(0,0695) | 0,0697<br>(0,0749) | 0,0744<br>(0,0802) | 0,0749<br>(0,0809) | 0,0775<br>(0,0841) |
| S                                                                       | 1,033              | 1,040              | 1,049              | 1,041              | 1,030              | 1,048              | 1,044              | 1,051              |
| $\Delta\rho_{min}/\Delta\rho_{max}$ (e <sup>-</sup> · Å <sup>-3</sup> ) | 0,164/-0,186       | 0,192/-0,215       | 0,186/-0,176       | 0,263/-0,193       | 0,280/-0,196       | 0,262/-0,196       | 0,275/-0,209       | 0,267/-0,184       |

| T(K)                                                                    | 260                | 280                | 290                | 285                | 265                | 245                | 225                | 205                |
|-------------------------------------------------------------------------|--------------------|--------------------|--------------------|--------------------|--------------------|--------------------|--------------------|--------------------|
| a (Å)                                                                   | 15,1103(11)        | 15,1186(12)        | 15,1213(7)         | 15,1196(7)         | 15,1158(7)         | 15,1081(7)         | 15,0984(6)         | 15,0800(7)         |
| b (Å)                                                                   | 14,4939(12)        | 14,5293(12)        | 14,5553(10)        | 14,5444(10)        | 14,5070(9)         | 14,4721(9)         | 14,4452(9)         | 14,4253(9)         |
| c (Å)                                                                   | 17,0017(8)         | 17,0171(8)         | 17,0282(11)        | 17,0230(11)        | 17,0102(11)        | 16,9844(11)        | 16,9444(10)        | 16,8673(11)        |
| $\beta$ (°)                                                             | 93,063(4)          | 93,012(4)          | 92,945(4)          | 92,966(4)          | 93,051(4)          | 93,095(4)          | 93,086(3)          | 92,994(3)          |
| V (Å <sup>3</sup> )                                                     | 3718,2(4)          | 3732,9(5)          | 3742,9(4)          | 3738,4(4)          | 3724,8(4)          | 3708,2(4)          | 3690,2(3)          | 664,2(4)           |
| $\mu$ (mm <sup>-1</sup> )                                               | 0,560              | 0,558              | 0,556              | 0,557              | 0,559              | 0,561              | 0,564              | 0,568              |
| $\rho$ (g cm <sup>-3</sup> )                                            | 1,330              | 1,325              | 1,322              | 1,323              | 1,328              | 1,334              | 1,340              | 1,350              |
| Domaine angulaire $\theta$ (°)                                          | 2,25 - 21,26       | 2,25 - 21,25       | 2,25 - 21,27       | 2,25 - 21,26       | 2,25 - 21,26       | 2,25 - 21,26       | 2,26 - 21,25       | 3,33 - 21,25       |
| Complétude                                                              | 0,85               | 0,85               | 0,92               | 0,92               | 0,91               | 0,91               | 0,92               | 0,92               |
| h min / max                                                             | -15/15             | -15/15             | -15/14             | -15/14             | -14/14             | -14/14             | -14/14             | -14/14             |
| k min / max                                                             | -11/14             | -11/14             | -15/14             | -15/14             | -14/11             | -14/11             | -14/11             | -14/11             |
| l min / max                                                             | -14/13             | -14/13             | -17/17             | -17/17             | -17/17             | -17/17             | -17/17             | -17/17             |
| Réflexions collectées                                                   | 5872               | 5876               | 5484               | 5476               | 5453               | 5431               | 5402               | 5359               |
| Réflexions<br>Indépendantes ( $R_{int}$ )                               | 3506<br>(0,0247)   | 3507<br>(0,0251)   | 3816<br>(0,0236)   | 3810<br>(0,0234)   | 3791<br>(0,0234)   | 3776<br>(0,0231)   | 3759<br>(0,0224)   | 3732<br>(0,0230)   |
| R(sigma)                                                                | 0,0424             | 0,0433             | 0,0451             | 0,0451             | 0,0438             | 0,0426             | 0,0417             | 0,0416             |
| Réflexions Observées<br>seuil : $I/\sigma(I)=2$                         | 2763               | 2745               | 2977               | 2988               | 2995               | 3035               | 3069               | 3074               |
| Nombre de paramètres                                                    | 460                | 460                | 460                | 460                | 460                | 460                | 460                | 460                |
| $R_{obs}$ (all)                                                         | 0,0364<br>(0,0532) | 0,0373<br>(0,0554) | 0,0375<br>(0,0548) | 0,0379<br>(0,0561) | 0,0360<br>(0,0530) | 0,0359<br>(0,0511) | 0,0349<br>(0,0488) | 0,0343<br>(0,0472) |
| $wR2_{obs}$ (all)                                                       | 0,0796<br>(0,0869) | 0,0763<br>(0,0843) | 0,0807<br>(0,0888) | 0,0789<br>(0,0869) | 0,0794<br>(0,0874) | 0,0766<br>(0,0843) | 0,0750<br>(0,0818) | 0,0749<br>(0,0814) |
| S                                                                       | 1,047              | 1,051              | 1,029              | 1,037              | 1,037              | 1,042              | 1,035              | 1,034              |
| $\Delta\rho_{min}/\Delta\rho_{max}$ (e <sup>-</sup> · Å <sup>-3</sup> ) | 0,287/-0,187       | 0,286/-0,148       | 0,201/-0,162       | 0,210/-0,164       | 0,217/-0,185       | 0,213/-0,183       | 0,267/-0,191       | 0,265/-0,218       |

| <b>T(K)</b>                                                             | <b>185</b>         | <b>165</b>         | <b>145</b>         | <b>125</b>         | <b>105</b>         | <b>115</b>         | <b>135</b>         | <b>155</b>         |
|-------------------------------------------------------------------------|--------------------|--------------------|--------------------|--------------------|--------------------|--------------------|--------------------|--------------------|
| $a$ (Å)                                                                 | 15,0534(8)         | 15,0266(8)         | 15,0133(8)         | 15,0070(8)         | 15,0064(8)         | 15,0068(9)         | 15,0091(9)         | 15,0171(9)         |
| $b$ (Å)                                                                 | 14,4184(10)        | 14,4078(11)        | 14,3893(11)        | 14,3657(10)        | 14,3397(11)        | 14,3500(12)        | 14,3725(12)        | 14,3939(12)        |
| $c$ (Å)                                                                 | 16,7682(12)        | 16,6985(13)        | 16,6664(12)        | 16,6511(12)        | 16,6293(13)        | 16,6364(14)        | 16,6495(14)        | 16,6705(14)        |
| $\beta$ (°)                                                             | 92,865(4)          | 92,813(4)          | 92,825(4)          | 92,856(4)          | 92,918(5)          | 92,859(5)          | 92,839(5)          | 92,807(5)          |
| $V$ (Å <sup>3</sup> )                                                   | 3634,9(4)          | 3610,9(4)          | 3596,1(4)          | 3585,3(4)          | 3573,8(4)          | 3578,1(5)          | 3587,2(5)          | 3599,1(5)          |
| $\mu$ (mm <sup>-1</sup> )                                               | 0,573              | 0,577              | 0,579              | 0,581              | 0,583              | 0,582              | 0,580              | 0,578              |
| $\rho$ (g cm <sup>-3</sup> )                                            | 1,361              | 1,370              | 1,375              | 1,380              | 1,384              | 1,382              | 1,379              | 1,374              |
| Domaine angulaire $\theta$ (°)                                          | 3,34 - 22,97       | 3,34 - 22,97       | 3,35 - 22,97       | 3,35 - 22,96       | 3,36 - 22,97       | 3,35 - 23,00       | 3,35 - 22,99       | 3,35 - 22,97       |
| Complétude                                                              | 0,81               | 0,81               | 0,81               | 0,81               | 0,80               | 0,80               | 0,80               | 0,80               |
| h min / max                                                             | -15/14             | -15/14             | -15/14             | -15/14             | -15/14             | -15/14             | -15/14             | -15/14             |
| k min / max                                                             | -15/11             | -15/11             | -15/11             | -15/11             | -15/11             | -15/11             | -15/11             | -15/11             |
| l min / max                                                             | -18/18             | -18/17             | -18/17             | -18/17             | -18/17             | -18/17             | -18/17             | -18/17             |
| Réflexions collectées                                                   | 5705               | 5651               | 5636               | 5597               | 5527               | 5529               | 5543               | 5570               |
| Réflexions<br>Indépendantes ( $R_{int}$ )                               | 4090<br>(0,0226)   | 4057<br>(0,0242)   | 4035<br>(0,0242)   | 4010<br>(0,0245)   | 3981<br>(0,0237)   | 3980<br>(0,0263)   | 3987<br>(0,0262)   | 4005<br>(0,0259)   |
| R(sigma)                                                                | 0,0425             | 0,0420             | 0,0415             | 0,0410             | 0,0408             | 0,0424             | 0,0429             | 0,0437             |
| Réflexions Observées<br>seuil : $I/\sigma(I)=2$                         | 3346               | 3443               | 3489               | 3482               | 3481               | 3441               | 3440               | 3411               |
| Nombre de paramètres                                                    | 460                | 460                | 460                | 460                | 460                | 460                | 460                | 460                |
| $R_{obs}$ (all)                                                         | 0,0358<br>(0,0486) | 0,0333<br>(0,0428) | 0,0306<br>(0,0390) | 0,0292<br>(0,0374) | 0,0286<br>(0,0359) | 0,0302<br>(0,0386) | 0,0301<br>(0,0386) | 0,0327<br>(0,0427) |
| $wR2_{obs}$ (all)                                                       | 0,0791<br>(0,0854) | 0,0746<br>(0,0793) | 0,0678<br>(0,0715) | 0,0659<br>(0,0699) | 0,0661<br>(0,0697) | 0,0702<br>(0,0744) | 0,0682<br>(0,0725) | 0,0727<br>(0,0773) |
| S                                                                       | 1,023              | 1,028              | 1,026              | 1,026              | 1,022              | 1,030              | 1,015              | 1,026              |
| $\Delta\rho_{min}/\Delta\rho_{max}$ (e <sup>-</sup> · Å <sup>-3</sup> ) | 0,423/-0,208       | 0,404/-0,209       | 0,328/-0,193       | 0,216/-0,204       | 0,221/-0,233       | 0,253/-0,236       | 0,274/-0,258       | 0,341/-0,229       |

| <b>T(K)</b>                                                             | <b>175</b>         | <b>195</b>         | <b>215</b>         | <b>235</b>         | <b>255</b>         | <b>275</b>         | <b>295</b>         |
|-------------------------------------------------------------------------|--------------------|--------------------|--------------------|--------------------|--------------------|--------------------|--------------------|
| $a$ (Å)                                                                 | 15,0368(9)         | 15,0676(7)         | 15,0902(6)         | 15,1045(7)         | 15,1127(7)         | 15,1192(7)         | 15,1239(7)         |
| $b$ (Å)                                                                 | 14,4119(12)        | 14,4217(10)        | 14,4342(9)         | 14,4584(9)         | 14,4897(9)         | 14,5268(9)         | 14,5665(10)        |
| $c$ (Å)                                                                 | 16,7208(14)        | 16,8187(11)        | 16,9112(10)        | 16,9678(10)        | 16,9969(10)        | 17,0178(10)        | 17,0273(11)        |
| $\beta$ (°)                                                             | 92,815(5)          | 92,929(4)          | 93,056(3)          | 93,103(4)          | 93,083(4)          | 93,017(4)          | 92,929(4)          |
| $V$ (Å <sup>3</sup> )                                                   | 3619,2(5)          | 3649,9(4)          | 3678,3(3)          | 3700,1(4)          | 3716,6(4)          | 3732,5(4)          | 3746,3(4)          |
| $\mu$ (mm <sup>-1</sup> )                                               | 0,575              | 0,570              | 0,566              | 0,563              | 0,560              | 0,558              | 0,556              |
| $\rho$ (g cm <sup>-3</sup> )                                            | 1,367              | 1,355              | 1,345              | 1,337              | 1,331              | 1,325              | 1,320              |
| Domaine angulaire $\theta$ (°)                                          | 3,34 – 22,98       | 3,33 - 22,98       | 2,26 - 22,97       | 2,25 - 22,97       | 2,25 - 22,98       | 2,25 - 22,97       | 2,25 - 22,98       |
| Complétude                                                              | 0,80               | 0,81               | 0,82               | 0,82               | 0,81               | 0,82               | 0,81               |
| h min / max                                                             | -15/14             | -15/15             | -15/15             | -15/15             | -15/15             | -15/15             | -15/15             |
| k min / max                                                             | -15/11             | -15/11             | -15/11             | -15/11             | -15/11             | -15/11             | -15/11             |
| l min / max                                                             | -18/18             | -18/18             | -18/18             | -18/18             | -18/18             | -18/18             | -18/18             |
| Réflexions collectées                                                   | 5633               | 5767               | 5827               | 5859               | 5886               | 5903               | 5918               |
| Réflexions<br>Indépendantes ( $R_{int}$ )                               | 4041<br>(0,0249)   | 4121<br>(0,0236)   | 4163<br>(0,0229)   | 4181<br>(0,0227)   | 4201<br>(0,0233)   | 4214<br>(0,0235)   | 4228<br>(0,0233)   |
| R(sigma)                                                                | 0,0437             | 0,0443             | 0,0442             | 0,0449             | 0,0462             | 0,0474             | 0,0487             |
| Réflexions Observées<br>seuil : $I/\sigma(I)=2$                         | 3343               | 3312               | 3303               | 3289               | 3244               | 3217               | 3159               |
| Nombre de paramètres                                                    | 460                | 460                | 460                | 460                | 460                | 460                | 460                |
| $R_{obs}$ (all)                                                         | 0,0348<br>(0,0469) | 0,0365<br>(0,0512) | 0,0381<br>(0,0539) | 0,0393<br>(0,0566) | 0,0389<br>(0,0584) | 0,0403<br>(0,0618) | 0,0421<br>(0,0657) |
| $wR2_{obs}$ (all)                                                       | 0,0773<br>(0,0832) | 0,0779<br>(0,0848) | 0,0797<br>(0,0872) | 0,0798<br>(0,0873) | 0,0801<br>(0,0895) | 0,0810<br>(0,0906) | 0,0822<br>(0,0920) |
| S                                                                       | 1,047              | 1,024              | 1,039              | 1,043              | 1,038              | 1,025              | 1,032              |
| $\Delta\rho_{min}/\Delta\rho_{max}$ (e <sup>-</sup> · Å <sup>-3</sup> ) | 0,444/-0,225       | 0,394/-0,213       | 0,337/-0,219       | 0,275/ -0,204      | 0,292/-0,197       | 0,256/-0,185       | 0,231/-0,175       |

## B- Experimental and crystallographic data for the SCXRD study of [Zn(PM-AzA)<sub>2</sub>(NCS)<sub>2</sub>]

| T(K)                                                                      | 290                | 270                | 250                | 230                | 210                | 190                | 170                | 150                |
|---------------------------------------------------------------------------|--------------------|--------------------|--------------------|--------------------|--------------------|--------------------|--------------------|--------------------|
| a (Å)                                                                     | 15,1300(8)         | 15,1251(8)         | 15,1195(7)         | 15,1135(7)         | 15,1082(7)         | 15,1034(6)         | 15,0995(6)         | 15,0958(6)         |
| b (Å)                                                                     | 14,5806(13)        | 14,5335(12)        | 14,4879(11)        | 14,4437(10)        | 14,4006(10)        | 14,3594(10)        | 14,3215(10)        | 14,2842(9)         |
| c (Å)                                                                     | 17,1485(16)        | 17,1467(15)        | 17,1458(13)        | 17,1447(12)        | 17,1451(12)        | 17,1456(11)        | 17,1475(11)        | 17,1476(11)        |
| β (°)                                                                     | 93,558(5)          | 93,657(5)          | 93,756(4)          | 93,836(4)          | 93,924(4)          | 94,006(4)          | 94,087(4)          | 94,159(3)          |
| V (Å <sup>3</sup> )                                                       | 3775,7(5)          | 3761,5(5)          | 3747,7(4)          | 3734,2(4)          | 3721,5(4)          | 3709,4(4)          | 3698,7(4)          | 3687,8(4)          |
| μ (mm <sup>-1</sup> )                                                     | 0,802              | 0,805              | 0,808              | 0,811              | 0,814              | 0,817              | 0,819              | 0,822              |
| ρ (g cm <sup>-3</sup> )                                                   | 1,327              | 1,332              | 1,337              | 1,342              | 1,346              | 1,350              | 1,354              | 1,358              |
| Domaine angulaire θ (°)                                                   | 2,23 – 25,02       | 2,24 – 25,02       | 2,24 – 25,02       | 2,24 – 25,02       | 2,24 – 25,02       | 2,24 – 25,02       | 2,24 – 25,02       | 2,25 – 25,04       |
| Complétude                                                                | 0,75               | 0,75               | 0,73               | 0,75               | 0,74               | 0,74               | 0,74               | 0,74               |
| h min / max                                                               | -13/14             | -13/14             | -13/14             | -13/14             | -13/14             | -13/14             | -13/14             | -13/14             |
| k min / max                                                               | -10/16             | -10/16             | -10/16             | -10/16             | -10/16             | -10/16             | -10/16             | -10/15             |
| l min / max                                                               | -20/20             | -20/20             | -20/20             | -20/20             | -20/20             | -20/20             | -20/20             | -20/20             |
| Réflexions collectées                                                     | 6496               | 6447               | 6247               | 6364               | 6349               | 6307               | 6270               | 6255               |
| Réflexions<br>Indépendantes (R <sub>int</sub> )                           | 4961<br>(0,0256)   | 4954<br>(0,0214)   | 4853<br>(0,0373)   | 4904<br>(0,0171)   | 4893<br>(0,0171)   | 4856<br>(0,0164)   | 4832<br>(0,0170)   | 4823<br>(0,0165)   |
| R(sigma)                                                                  | 0,0515             | 0,0486             | 0,0467             | 0,0377             | 0,0371             | 0,0364             | 0,0361             | 0,0354             |
| Réflexions Observées<br>seuil : I/σ(I)=2                                  | 3519               | 3678               | 3908               | 4098               | 4170               | 4213               | 4246               | 4326               |
| Nombre de paramètres                                                      | 460                | 460                | 460                | 460                | 460                | 460                | 460                | 460                |
| R <sub>obs</sub> (all)                                                    | 0,0504<br>(0,0806) | 0,0501<br>(0,0743) | 0,0571<br>(0,0720) | 0,0475<br>(0,0589) | 0,0477<br>(0,0579) | 0,0464<br>(0,0548) | 0,0450<br>(0,0524) | 0,0437<br>(0,0497) |
| wR2 <sub>obs</sub> (all)                                                  | 0,1164<br>(0,1323) | 0,1238<br>(0,1370) | 0,1567<br>(0,1690) | 0,1253<br>(0,1330) | 0,1269<br>(0,1341) | 0,1233<br>(0,1292) | 0,1193<br>(0,1245) | 0,1169<br>(0,1212) |
| S                                                                         | 1,044              | 1,033              | 1,054              | 1,048              | 1,064              | 1,058              | 1,050              | 1,067              |
| Δρ <sub>min</sub> / Δρ <sub>max</sub> (e <sup>-</sup> · Å <sup>-3</sup> ) | -0,247/0,559       | -0,219/0,706       | -0,307/0,880       | -0,278/0,950       | -0,316/1,107       | -0,305/1,197       | -0,249/1,327       | -0,253/1,457       |

| <b>T(K)</b>                                                             | <b>130</b>         | <b>110</b>         | <b>90</b>          | <b>100</b>         | <b>120</b>         | <b>140</b>         | <b>160</b>         | <b>180</b>         |
|-------------------------------------------------------------------------|--------------------|--------------------|--------------------|--------------------|--------------------|--------------------|--------------------|--------------------|
| $a$ (Å)                                                                 | 15,0934(6)         | 15,0918(6)         | 15,0920(6)         | 15,0917(6)         | 15,0920(6)         | 15,0940(6)         | 15,0970(6)         | 15,1007(6)         |
| $b$ (Å)                                                                 | 14,2495(9)         | 14,2146(9)         | 14,1832(9)         | 14,1960(9)         | 14,2288(9)         | 14,2636(9)         | 14,3013(9)         | 14,3389(10)        |
| $c$ (Å)                                                                 | 17,1470(10)        | 17,1441(10)        | 17,1387(10)        | 17,1443(10)        | 17,1508(10)        | 17,1499(11)        | 17,1496(11)        | 17,1477(11)        |
| $\beta$ (°)                                                             | 94,234(3)          | 94,286(3)          | 94,321(3)          | 94,310(3)          | 94,277(3)          | 94,206(3)          | 94,136(4)          | 94,055(4)          |
| $V$ (Å <sup>3</sup> )                                                   | 3677,8(3)          | 3667,5(3)          | 3658,2(3)          | 3662,6(3)          | 3672,7(3)          | 3682,3(4)          | 3693,1(4)          | 3703,7(4)          |
| $\mu$ (mm <sup>-1</sup> )                                               | 0,824              | 0,826              | 0,828              | 0,827              | 0,825              | 0,823              | 0,820              | 0,818              |
| $\rho$ (g cm <sup>-3</sup> )                                            | 1,362              | 1,366              | 1,369              | 1,368              | 1,364              | 1,360              | 1,356              | 1,353              |
| Domaine angulaire $\theta$ (°)                                          | 2,23 – 25,02       | 2,25 – 25,03       | 2,24 – 25,02       | 2,25 – 25,02       | 2,25 – 25,04       | 2,25 – 25,03       | 2,25 – 25,02       | 2,24 – 25,02       |
| Complétude                                                              | 0,74               | 0,74               | 0,74               | 0,74               | 0,74               | 0,74               | 0,74               | 0,74               |
| h min / max                                                             | -13/14             | -13/14             | -13/14             | -13/14             | -13/14             | -13/14             | -13/14             | -13/14             |
| k min / max                                                             | -10/15             | -10/15             | -10/15             | -10/15             | -10/15             | -10/15             | -10/15             | -10/16             |
| l min / max                                                             | -20/20             | -20/20             | -20/20             | -20/20             | -20/20             | -20/20             | -20/20             | -20/20             |
| Réflexions collectées                                                   | 6234               | 6199               | 6201               | 6214               | 6194               | 6207               | 6250               | 6271               |
| Réflexions<br>Indépendantes ( $R_{int}$ )                               | 4801<br>(0,0170)   | 4780<br>(0,0167)   | 4782<br>(0,0168)   | 4779<br>(0,0168)   | 4793<br>(0,0164)   | 4805<br>(0,0169)   | 4824<br>(0,0170)   | 4832<br>(0,0170)   |
| R(sigma)                                                                | 0,0349             | 0,0345             | 0,0343             | 0,0345             | 0,0347             | 0,0353             | 0,0358             | 0,0363             |
| Réflexions Observées<br>seuil : $I/\sigma(I)=2$                         | 4389               | 4413               | 4457               | 4423               | 4404               | 4326               | 4274               | 4218               |
| Nombre de paramètres                                                    | 460                | 460                | 460                | 460                | 460                | 460                | 460                | 460                |
| $R_{obs}$ (all)                                                         | 0,0430<br>(0,0481) | 0,0423<br>(0,0463) | 0,0423<br>(0,0455) | 0,0421<br>(0,0458) | 0,0422<br>(0,0465) | 0,0431<br>(0,0488) | 0,0446<br>(0,0513) | 0,0458<br>(0,0539) |
| $wR2_{obs}$ (all)                                                       | 0,1131<br>(0,1167) | 0,1044<br>(0,1069) | 0,1068<br>(0,1088) | 0,1076<br>(0,1100) | 0,1077<br>(0,1105) | 0,1083<br>(0,1119) | 0,1185<br>(0,1234) | 0,1174<br>(0,1228) |
| S                                                                       | 1,085              | 1,060              | 1,077              | 1,075              | 1,087              | 1,060              | 1,053              | 1,030              |
| $\Delta\rho_{min}/\Delta\rho_{max}$ (e <sup>-</sup> · Å <sup>-3</sup> ) | -0,326/1,646       | -0,303/1,759       | -0,310/ 1,896      | -0,284/ 1,874      | -0,257/ 1,673      | -0,277/ 1,563      | -0,260/ 1,401      | -0,274/ 1,233      |



| <b>T(K)</b>                                                                  | <b>200</b>         | <b>220</b>         | <b>240</b>         | <b>260</b>         | <b>280</b>         |
|------------------------------------------------------------------------------|--------------------|--------------------|--------------------|--------------------|--------------------|
| <b>a</b> (Å)                                                                 | 15,1058(7)         | 15,1104(7)         | 15,1170(7)         | 15,1221(7)         | 15,1281(7)         |
| <b>b</b> (Å)                                                                 | 14,3790(10)        | 14,4217(10)        | 14,4666(10)        | 14,5091(11)        | 14,5550(11)        |
| <b>c</b> (Å)                                                                 | 17,1457(12)        | 17,1457(12)        | 17,1452(12)        | 17,1448(13)        | 17,1464(13)        |
| <b>β</b> (°)                                                                 | 93,973(4)          | 93,883(4)          | 93,793(4)          | 93,707(4)          | 93,621(4)          |
| <b>V</b> (Å <sup>3</sup> )                                                   | 3715,2(4)          | 3727,8(4)          | 3741,3(4)          | 3753,8(4)          | 3767,9(4)          |
| <b>μ</b> (mm <sup>-1</sup> )                                                 | 0,816              | 0,813              | 0,810              | 0,807              | 0,804              |
| <b>ρ</b> (g cm <sup>-3</sup> )                                               | 1,348              | 1,344              | 1,339              | 1,334              | 1,330              |
| Domaine angulaire <b>θ</b> (°)                                               | 2,24 – 25,02       | 2,24 – 25,02       | 2,24 – 25,02       | 2,24 – 25,02       | 2,23 – 25,02       |
| Complétude                                                                   | 0,74               | 0,74               | 0,74               | 0,74               | 0,74               |
| <b>h</b> min / max                                                           | -13/14             | -13/14             | -13/14             | -13/14             | -13/14             |
| <b>k</b> min / max                                                           | -10/16             | -10/16             | -10/16             | -10/16             | -10/16             |
| <b>l</b> min / max                                                           | -20/20             | -20/20             | -20/20             | -20/20             | -20/20             |
| Réflexions collectées                                                        | 6282               | 6360               | 6329               | 6395               | 6403               |
| Réflexions<br>Indépendantes ( <b>R<sub>int</sub></b> )                       | 4853<br>(0,0168)   | 4875<br>(0,0196)   | 4894<br>(0,0168)   | 4922<br>(0,0170)   | 4932<br>(0,0172)   |
| <b>R</b> (sigma)                                                             | 0,0368             | 0,0368             | 0,0387             | 0,0389             | 0,0397             |
| Réflexions Observées<br>seuil : <b>I</b> / <b>σ</b> ( <b>I</b> )=2           | 4155               | 4094               | 4017               | 3973               | 3891               |
| Nombre de paramètres                                                         | 460                | 460                | 460                | 460                | 460                |
| <b>R<sub>obs</sub></b> (all)                                                 | 0,0467<br>(0,0558) | 0,0468<br>(0,0585) | 0,0476<br>(0,0604) | 0,0484<br>(0,0635) | 0,0468<br>(0,0635) |
| <b>wR<sub>2obs</sub></b> (all)                                               | 0,1203<br>(0,1265) | 0,1160<br>(0,1240) | 0,1239<br>(0,1329) | 0,1251<br>(0,1352) | 0,1132<br>(0,1231) |
| <b>S</b>                                                                     | 1,057              | 1,046              | 1,044              | 1,071              | 1,035              |
| <b>Δρ<sub>min</sub>/Δρ<sub>max</sub></b> (e <sup>-</sup> · Å <sup>-3</sup> ) | -0,273/1,121       | -0,293/1,016       | -0,251/0,846       | -0,247/0,762       | -0,244/0,579       |

| <b>T(K)</b>                                                                | <b>80</b>                        | <b>290</b>    |
|----------------------------------------------------------------------------|----------------------------------|---------------|
| Dimensions du cristal (mm <sup>3</sup> )                                   | 0,6 x 0,6 x 0,45 mm <sup>3</sup> |               |
| Système                                                                    | monoclinique                     |               |
| Groupe d'espace                                                            | P 2 <sub>1</sub> /c, Z=4         |               |
| <u>a</u> (Å)                                                               | 15,0997(2)                       | 15,1376(3)    |
| <u>b</u> (Å)                                                               | 14,1762(2)                       | 14,5802(3)    |
| <u>c</u> (Å)                                                               | 17,1299(3)                       | 17,1465(4)    |
| $\beta$ (°)                                                                | 94,3202(9)                       | 93,5485(13)   |
| V (Å <sup>3</sup> )                                                        | 3656,4(1)                        | 3777,2(2)     |
| mosaïcité (°)                                                              | 0,882(1)                         | 0,905(1)      |
| absorption $\mu$ (mm <sup>-1</sup> )                                       | 0,83                             | 0,80          |
| Domaine angulaire $\theta$ (°)                                             | 2,25 / 30,04                     | 2,23 / 30,05  |
| Complétude                                                                 | 0,997                            | 0,998         |
| h min / max                                                                | -21/21                           | -21/21        |
| k min / max                                                                | -19/19                           | -20/20        |
| l min / max                                                                | -24/24                           | -24/24        |
| Réflexions collectées                                                      | 21321                            | 22045         |
| Réflexions Indépendantes (R <sub>int</sub> )                               | 10671 (0,015)                    | 11045 (0,028) |
| R(sigma)                                                                   | 0,022                            | 0,036         |
| Réflexions Observées<br>(I/ $\sigma$ (I) $\geq$ 2)                         | 9651                             | 6605          |
| Nombre de paramètres affinés                                               | 460                              | 460           |
| R <sub>obs</sub> (all)                                                     | 0,043(0,049)                     | 0,058(0,103)  |
| wR2 <sub>obs</sub> (all)                                                   | 0,1185                           | 0,184         |
| S                                                                          | 1,07                             | 1,03          |
| $\Delta\rho_{\max} / \Delta\rho_{\min}$ (e <sup>-</sup> ·Å <sup>-3</sup> ) | 3,16/ -0,33                      | 0,85/-0,51    |

## C- MOSSBAUER of $[\text{Fe}(\text{PM-AzA})_2(\text{NCS})_2]$

At 295 K

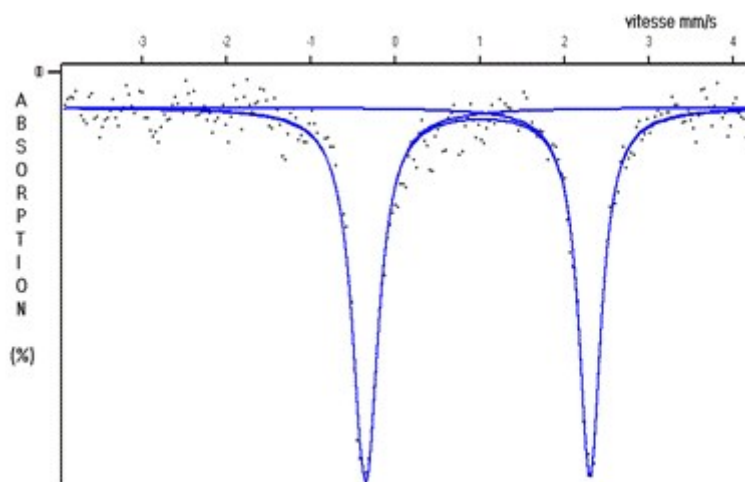

| Site | $\delta$ (mm/s) | $\Gamma$ (mm/s) | $\Delta$ (mm/s) | %     |                     |
|------|-----------------|-----------------|-----------------|-------|---------------------|
| 1    | 0,96            | 0,34            | 2,66            | 100,0 | $\text{Fe}^{2+}$ HS |

At 4.2K

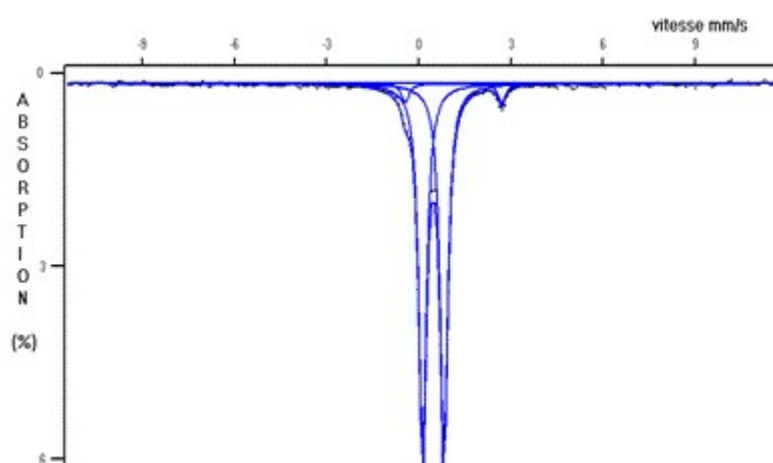

| Site | $\delta$ (mm/s) | $\Gamma$ (mm/s) | $\Delta$ (mm/s) | %  |
|------|-----------------|-----------------|-----------------|----|
| 1    | 1,1             | 0,27            | 3,1             | 5  |
| 2    | 0,43            | 0,30            | 0,70            | 95 |

## D- Matrix of the DILATATION TENSORS

PAScal software.

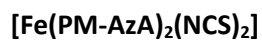

**In the range [295-260 K]**

|    | <u>a</u> | <u>b</u> | <u>c</u> | $\alpha$ (10 <sup>-6</sup> K <sup>-1</sup> ) |
|----|----------|----------|----------|----------------------------------------------|
| X1 | 0,8811   | 0,0000   | -0,4728  | -9(8)                                        |
| X2 | 0,5824   | 0,0000   | 0,8129   | 56(13)                                       |
| X3 | 0,0000   | 1,0000   | 0,0000   | 120(14)                                      |
| V  |          |          |          | 222(24)                                      |

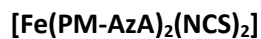

**In the range [140-105 K]**

|    | <u>a</u> | <u>b</u> | <u>c</u> | $\alpha$ (10 <sup>-6</sup> K <sup>-1</sup> ) |
|----|----------|----------|----------|----------------------------------------------|
| X1 | 0,9545   | 0,0000   | -0,2983  | 4 (10)                                       |
| X2 | 0,3970   | 0,0000   | 0,9178   | 50(7)                                        |
| X3 | 0,0000   | 1,0000   | 0,0000   | 72(6)                                        |
| V  |          |          |          | 129(5)                                       |

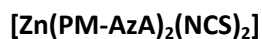

**In the range [295-260 K]**

|    | <u>a</u> | <u>b</u> | <u>c</u> | $\alpha$ (10 <sup>-6</sup> K <sup>-1</sup> ) |
|----|----------|----------|----------|----------------------------------------------|
| X1 | 0,6839   | 0,0000   | -0,7295  | -28(2)                                       |
| X2 | 0,8014   | 0,0000   | 0,5982   | 58(1)                                        |
| X3 | 0,0000   | -1,0000  | 0,0000   | 164(1)                                       |
| V  |          |          |          | 194(2)                                       |

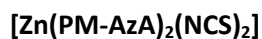

**In the range [140-100 K]**

| Axes principaux | <u>a</u> | <u>b</u> | <u>c</u> | $\alpha$ (10 <sup>-6</sup> K <sup>-1</sup> ) |
|-----------------|----------|----------|----------|----------------------------------------------|
| X1              | 0,8995   | 0,0000   | -0,4369  | -15(1)                                       |
| X2              | 0,5645   | 0,0000   | 0,8254   | 31(1)                                        |
| X3              | 0,0000   | 1,0000   | 0,0000   | 119(2)                                       |
| V               |          |          |          | 135(1)                                       |

## E- POSITIONAL DISORDER in $[\text{Fe}(\text{PM-AzA})_2(\text{NCS})_2]$

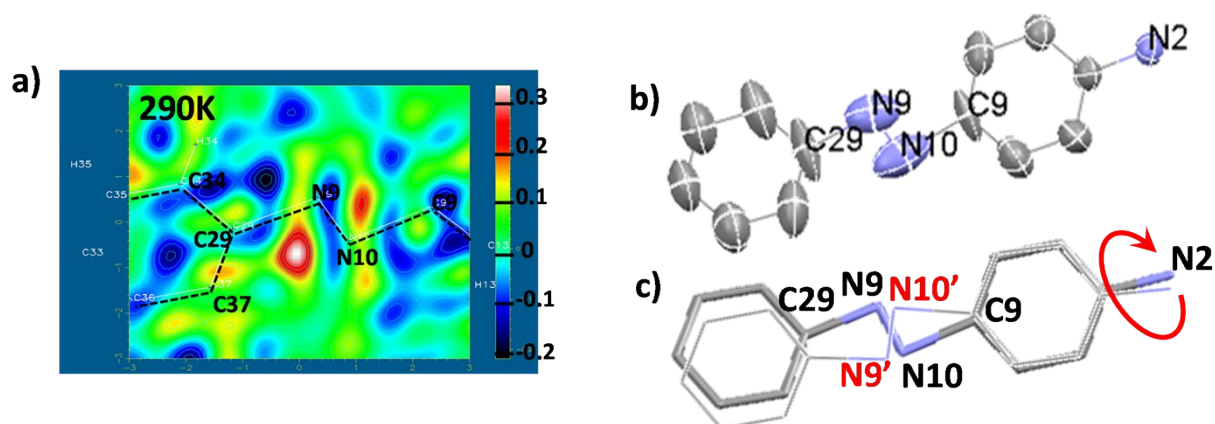

A) Difference Fourier map showing the positional disorder in the PM-AzA ligand

B) View of ADP when the main positions are used

C) Representation of the disorder, structural data as collected here (0.9 Å resolution) does not allow to refine the secondary positions
